# Supplementary material for: Phytochemical Composition and Antioxidant Properties of Tambourissa ficus, a Mauritian Endemic Fruit
Source: MDPI journal article supplement (doi:10.3390/app131910908), 2023-10-01
Supplement: s1 [file s1]

**Table S1.** Peak information of *T. ficus* fruit flesh extracts.

| Wavelength (nm) | Absorbance | Compound Class                   |
|-----------------|------------|----------------------------------|
| water           |            |                                  |
| 230             | 4.328      | phenolics, flavonoids, alkaloids |
| 248             | 4.348      | phenolics, flavonoids, alkaloids |
| 260             | 4.032      | phenolics, flavonoids, alkaloids |
| ethanol         |            |                                  |
| 228             | 2.667      | phenolics, flavonoids, alkaloids |
| 262             | 3.302      | phenolics, flavonoids, alkaloids |
| 295             | 3.322      | phenolics, flavonoids, alkaloids |
| 332             | 0.294      | phenolics, flavonoids, alkaloids |
| 667             | 0.17       | chlorophyll                      |
| methanol        |            |                                  |
| 230             | 3.034      | phenolics, flavonoids, alkaloids |
| 248             | 3.318      | phenolics, flavonoids, alkaloids |
| 277             | 3.332      | phenolics, flavonoids, alkaloids |
| 293             | 3.352      | phenolics, flavonoids, alkaloids |
| 320             | 3.035      | phenolics, flavonoids, alkaloids |
| 430             | 0.433      | terpenes, carotenoids, tannins   |
| 660             | -0.173     | chlorophyll                      |
| propanol        |            |                                  |
| 272             | 1.454      | phenolics, flavonoids, alkaloids |
| 306             | 1.746      | phenolics, flavonoids, alkaloids |
| 297             | 1.882      | phenolics, flavonoids, alkaloids |
| 418             | 0.567      | terpenes, carotenoids, tannins   |
| 672             | 0.187      | chlorophyll                      |
| acetone         |            |                                  |
| 226             | 1.156      | phenolics, flavonoids, alkaloids |
| 409             | 0.643      | terpenes, carotenoids, tannins   |
| 669             | 0.206      | chlorophyll                      |

**Table S2.** FTIR peaks interpretation of freeze-dried powdered *T. ficus* flesh.

| Absorption (cm <sup>-1</sup> ) | Group                      | Compound class         |
|--------------------------------|----------------------------|------------------------|
| 3859                           | O-H stretching             | alcohol                |
| 3740                           | O-H stretching             | alcohol                |
| 3286                           | O-H stretching             | alcohol                |
| 2928                           | C-H stretching             | lipid                  |
| 2852                           | C-H stretching             | aldehyde               |
| 2330                           | O=C=O                      | carbon dioxide         |
| 2202                           | C≡C stretching             | alkyne                 |
| 2115                           | C≡C stretching             | alkyne                 |
| 2035                           | C=C=C stretching           | alkene                 |
| 2013                           | C=C=C stretching           | alkene                 |
| 1790                           | C-H bending C=O stretching | aromatic compound      |
| 1738                           | C-H bending C=O stretching | aromatic compound      |
| 1612                           | C=C stretching             | α,β-unsaturated ketone |
| 1440                           | C-H bending                | alkane                 |

|       |                |                      |
|-------|----------------|----------------------|
| 1410  | O-H bending    | carboxylic acid      |
| 1370  | O-H bending    | phenol               |
| 1318  | O-H bending    | phenol               |
| 1245  | C-O stretching | alkyl aryl ether     |
| 1152  | C-O stretching | aliphatic ether      |
| 1104  | C-N stretching | aromatic amine       |
| 1054  | C-O stretching | primary alcohol      |
| 1022  | C-O stretching | primary alcohol      |
| 811.3 | C=C bending    | alkene               |
| 917.6 | C=C bending    | alkene               |
| 867.7 | C-H bending    | 1,2,4-trisubstituted |
| 811.3 | C-H bending    | 1,2,4-trisubstituted |
| 778.7 | C-H bending    | 1,3-disubstituted    |
| 711.5 | C-H bending    | 1,3-disubstituted    |
| 665.9 | C-I stretching | halo Compound        |
| 629.1 | C-I stretching | halo Compound        |
| 590.0 | C-I stretching | halo Compound        |
| 555.3 | C-I stretching | halo Compound        |
| 520.6 | C-I stretching | halo Compound        |
| 464.2 | O-H stretching | alcohol              |
| 418.7 | O-H stretching | alcohol              |

**Table S3.** FTIR peaks interpretation of ethanol extract of *T. ficus* flesh.

| Absorption (cm <sup>-1</sup> ) | Group            | Compound Class  |
|--------------------------------|------------------|-----------------|
| 3935                           | O-H stretching   | alcohol         |
| 3908                           | O-H stretching   | alcohol         |
| 3834                           | O-H stretching   | alcohol         |
| 3740                           | O-H stretching   | alcohol         |
| 3648                           | O-H stretching   | alcohol         |
| 3590                           | O-H stretching   | alcohol         |
| 3573                           | O-H stretching   | alcohol         |
| 3313                           | N-H stretching   | secondary amine |
| 3007                           | O-H stretching   | carboxylic acid |
| 2957                           | O-H stretching   | alcohol         |
| 2924                           | C-H stretching   | lipid           |
| 2856                           | C-H stretching   | alkane          |
| 2211                           | C≡N stretching   | alkyne          |
| 2159                           | N=N=N stretching | azide           |
| 2142                           | C≡N stretching   | nitrile         |
| 2035                           | C=C=C            | alkene          |

|       |                    |                                    |
|-------|--------------------|------------------------------------|
| 2000  | C=C=N              | ketenimine                         |
| 1973  | C-H bending        | aromatic compound                  |
| 1950  | C-H bending        | aromatic compound                  |
| 1746  | C=O stretching     | conjugated anhydride               |
| 1629  | C=C stretching     | conjugated alkene                  |
| 1518  | N-O stretching     | nitro compound                     |
| 1457  | C-H bending        | alkane                             |
| 1415  | O-H bending        | alcohol                            |
| 1378  | O-H bending        | phenol                             |
| 1349  | O-H bending        | phenol                             |
| 1263  | C-O stretching     | alkyl aryl ether                   |
| 1154  | C-O stretching     | aliphatic ether                    |
| 1083  | C-O stretching     | aliphatic ether                    |
| 1057  | C-O stretching     | primary alcohol                    |
| 1034  | CO-O-CO stretching | anhydride                          |
| 997.3 | C=C bending        | alkene                             |
| 968.6 | C=C bending        | alkene                             |
| 915.0 | C=C bending        | alkene                             |
| 867.2 | C-H bending        | 1,2,4-trisubstituted               |
| 821.3 | C-H bending        | 1,2,3,4-tetrasubstituted           |
| 775.3 | C-H bending        | 1,3-disubstituted                  |
| 725.6 | C-H bending        | monosubstituted benzene derivative |
| 639.5 | C-H bending        | monosubstituted benzene derivative |
| 595.4 | C-I stretching     | halo compound                      |
| 518.9 | C-I stretching     | halo compound                      |

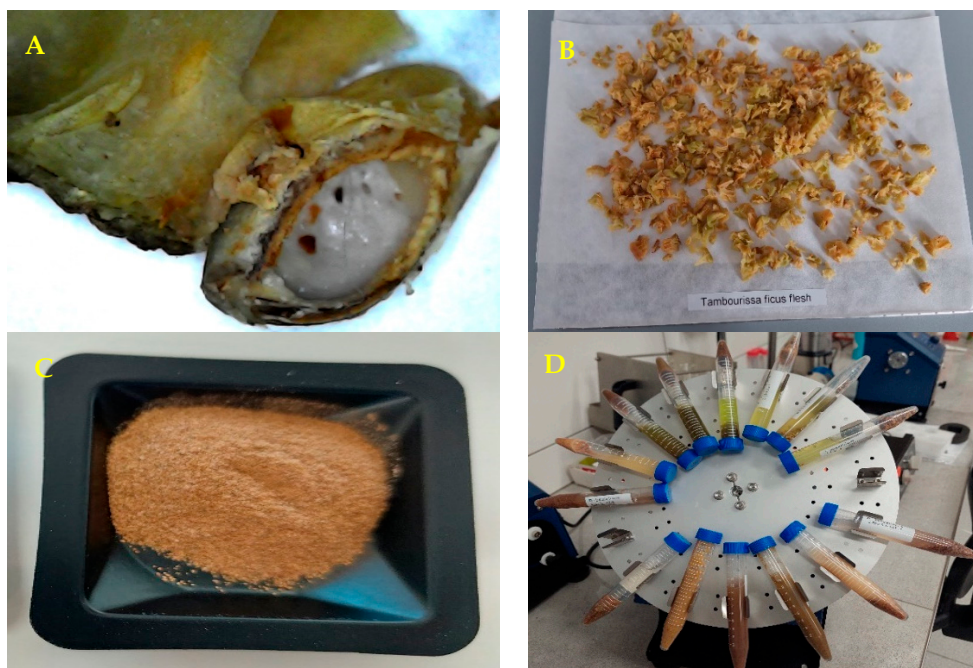

**Figure S1.** *T. ficus* preparation, A. Dissection picture of *T. ficus* showing yellow flesh and white seed; B. Dried *T. ficus* flesh; C. Dried *T. ficus* powder; D. Picture of rotator used to macerate *T. ficus* powder.

RT: 0.00 - 75.03

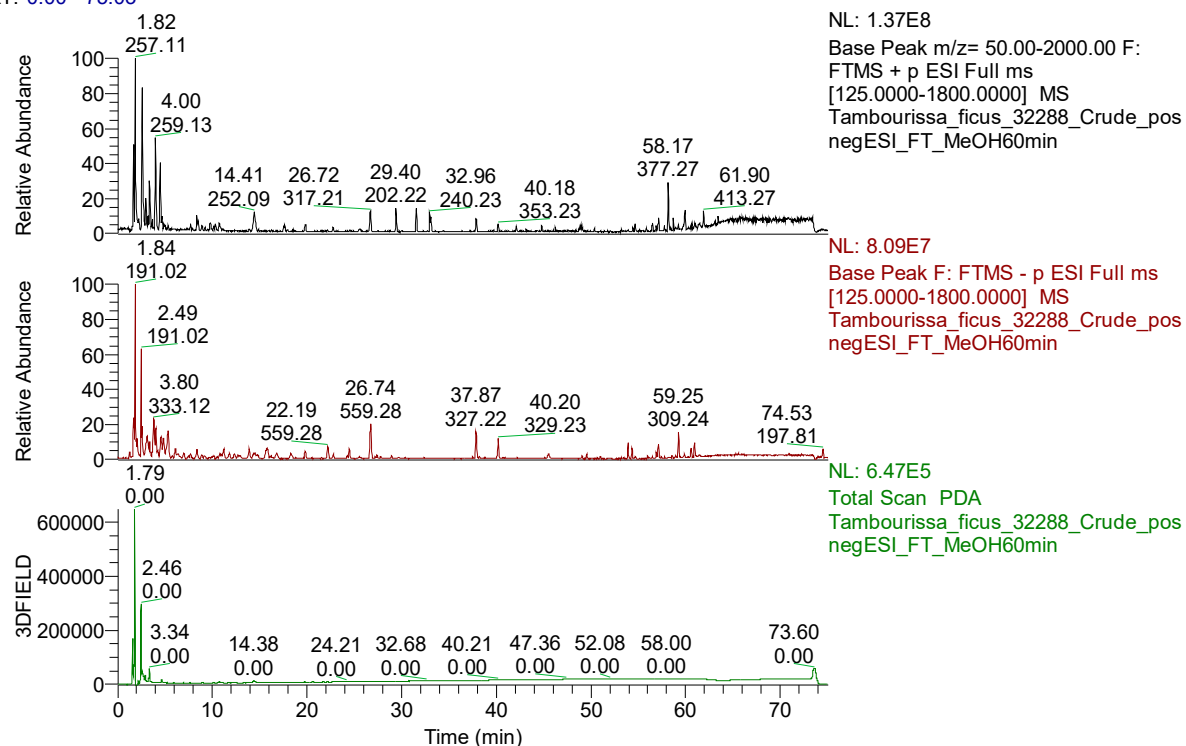

**Figure S2.** LC-MS chromatogram of methanol extract of *T. ficus*.
